# Supplementary material for: Attitudes of University Students towards Mandatory COVID-19 Vaccination Policies: A Cross-Sectional Survey in Rome, Italy
Source: MDPI journal article supplement (doi:10.3390/vaccines11040721), 2023-03-23
Supplement: s1 [file s1]

**Supplementary Table S1.** Students' sociodemographic characteristics by attitude towards mandatory COVID-19 vaccination (N = 5287). Results are expressed as mean (standard deviation, SD), median (interquartile range, IQR), or frequency (percentage, %).

|                              | Attitude towards mandatory COVID-19 vaccination for healthcare workers |                             |                 | Attitude towards mandatory COVID-19 vaccination for all people aged 12 or above |                             |                 | Attitude towards mandatory COVID-19 vaccination as a requirement for admission to schools and universities |                             |                 |
|------------------------------|------------------------------------------------------------------------|-----------------------------|-----------------|---------------------------------------------------------------------------------|-----------------------------|-----------------|------------------------------------------------------------------------------------------------------------|-----------------------------|-----------------|
|                              | Negative attitude<br>N=1597                                            | Positive attitude<br>N=3690 | <i>p</i> -Value | Negative attitude<br>N=2398                                                     | Positive attitude<br>N=2889 | <i>p</i> -Value | Negative attitude<br>N=2206                                                                                | Positive attitude<br>N=3081 | <i>p</i> -Value |
| Survey period, N (%)         |                                                                        |                             | <0.001          |                                                                                 |                             | <0.001          |                                                                                                            |                             | <0.001          |
| September-October 2021       | 416 (26.0)                                                             | 824 (22.3)                  |                 | 602 (25.1)                                                                      | 638 (22.1)                  |                 | 586 (26.6)                                                                                                 | 654 (21.2)                  |                 |
| November-December 2021       | 805 (50.4)                                                             | 2156 (58.4)                 |                 | 1258 (52.5)                                                                     | 1703 (58.9)                 |                 | 1125 (51.0)                                                                                                | 1836 (59.6)                 |                 |
| January-February 2022        | 376 (23.5)                                                             | 710 (19.2)                  |                 | 538 (22.4)                                                                      | 548 (19.0)                  |                 | 495 (22.4)                                                                                                 | 591 (19.2)                  |                 |
| Age, years                   |                                                                        |                             |                 |                                                                                 |                             |                 |                                                                                                            |                             |                 |
| Mean (SD)                    | 24.3 (5.2)                                                             | 23.8 (4.1)                  | <0.001          | 24.0 (4.8)                                                                      | 23.9 (4.2)                  | 0.450           | 24.0 (4.7)                                                                                                 | 23.9 (4.3)                  | 0.330           |
| Median (IQR)                 | 23.2<br>(21.3-25.6)                                                    | 23.0<br>(21.2-25.0)         | 0.013           | 23.0<br>(21.1-25.3)                                                             | 23.1<br>(21.3-25.1)         | 0.220           | 23.0<br>(21.2-25.4)                                                                                        | 23.1<br>(21.3-25.1)         | 0.950           |
| Gender, N (%)                |                                                                        |                             | <0.001          |                                                                                 |                             | <0.001          |                                                                                                            |                             | <0.001          |
| Female                       | 1000 (62.6)                                                            | 2580 (69.9)                 |                 | 1546 (64.5)                                                                     | 2034 (70.4)                 |                 | 1415 (64.1)                                                                                                | 2165 (70.3)                 |                 |
| Male                         | 597 (37.4)                                                             | 1110 (30.1)                 |                 | 852 (35.5)                                                                      | 855 (29.6)                  |                 | 791 (35.9)                                                                                                 | 916 (29.7)                  |                 |
| Nationality, N (%)           |                                                                        |                             | <0.001          |                                                                                 |                             | <0.001          |                                                                                                            |                             | <0.001          |
| Italian                      | 1304 (81.7)                                                            | 3328 (90.2)                 |                 | 2021 (84.3)                                                                     | 2611 (90.4)                 |                 | 1845 (83.6)                                                                                                | 2787 (90.5)                 |                 |
| Non-Italian                  | 293 (18.3)                                                             | 362 (9.8)                   |                 | 377 (15.7)                                                                      | 278 (9.6)                   |                 | 361 (16.4)                                                                                                 | 294 (9.5)                   |                 |
| Area of study, N (%)         |                                                                        |                             | <0.001          |                                                                                 |                             | <0.001          |                                                                                                            |                             | <0.001          |
| Healthcare                   | 534 (33.4)                                                             | 1460 (39.6)                 |                 | 816 (34.0)                                                                      | 1178 (40.8)                 |                 | 741 (33.6)                                                                                                 | 1253 (40.7)                 |                 |
| Science & Technology         | 513 (32.1)                                                             | 1115 (30.2)                 |                 | 763 (31.8)                                                                      | 865 (29.9)                  |                 | 705 (32.0)                                                                                                 | 923 (30.0)                  |                 |
| Social Sciences & Humanities | 550 (34.4)                                                             | 1115 (30.2)                 |                 | 819 (34.2)                                                                      | 846 (29.3)                  |                 | 760 (34.5)                                                                                                 | 905 (29.4)                  |                 |
| Year of study, N (%)         |                                                                        |                             | 0.270           |                                                                                 |                             | 0.005           |                                                                                                            |                             | 0.005           |
| First or second              | 1011 (63.3)                                                            | 2277 (61.7)                 |                 | 1541 (64.3)                                                                     | 1747 (60.5)                 |                 | 1421 (64.4)                                                                                                | 1867 (60.6)                 |                 |
| Third or above               | 586 (36.7)                                                             | 1413 (38.3)                 |                 | 857 (35.7)                                                                      | 1142 (39.5)                 |                 | 785 (35.6)                                                                                                 | 1214 (39.4)                 |                 |
| Finances, N (%)              |                                                                        |                             | <0.001          |                                                                                 |                             | 0.065           |                                                                                                            |                             | 0.062           |
| Many difficulties            | 93 (5.8)                                                               | 144 (3.9)                   |                 | 119 (5.0)                                                                       | 118 (4.1)                   |                 | 108 (4.9)                                                                                                  | 129 (4.2)                   |                 |
| Some difficulties            | 424 (26.5)                                                             | 915 (24.8)                  |                 | 631 (26.3)                                                                      | 708 (24.5)                  |                 | 593 (26.9)                                                                                                 | 746 (24.2)                  |                 |
| Managing well enough         | 832 (52.1)                                                             | 1921 (52.1)                 |                 | 1241 (51.8)                                                                     | 1512 (52.3)                 |                 | 1122 (50.9)                                                                                                | 1631 (52.9)                 |                 |

|                                    |             |             |        |             |             |        |             |             |
|------------------------------------|-------------|-------------|--------|-------------|-------------|--------|-------------|-------------|
| Managing very well                 | 248 (15.5)  | 710 (19.2)  |        | 407 (17.0)  | 551 (19.1)  |        | 383 (17.4)  | 575 (18.7)  |
| Previous COVID-19 infection, N (%) |             |             | <0.001 |             |             | <0.001 |             | <0.001      |
| No infection                       | 1367 (85.6) | 3342 (90.6) |        | 2085 (86.9) | 2624 (90.8) |        | 1919 (87.0) | 2790 (90.6) |
| Asymptomatic or mild symptoms      | 200 (12.5)  | 301 (8.2)   |        | 270 (11.3)  | 231 (8.0)   |        | 250 (11.3)  | 251 (8.1)   |
| Moderate or severe symptoms        | 30 (1.9)    | 47 (1.3)    |        | 43 (1.8)    | 34 (1.2)    |        | 37 (1.7)    | 40 (1.3)    |

---

COVID-19: coronavirus disease 2019.

Pearson's chi-squared test for categorical variables and Mann-Whitney U test for continuous variables.

**Supplementary Table S2.** Students' COVID-19 experience and risk perceptions by attitude towards mandatory COVID-19 vaccination (N = 5287). Results are expressed as mean (standard deviation, SD) or frequency (percentage, %).

|                                                                                                                                 | Attitude towards mandatory COVID-19 vaccination for healthcare workers |                             |                 | Attitude towards mandatory COVID-19 vaccination for all people aged 12 or above |                             |                 | Attitude towards mandatory COVID-19 vaccination as a requirement for admission to schools and universities |                             |                 |
|---------------------------------------------------------------------------------------------------------------------------------|------------------------------------------------------------------------|-----------------------------|-----------------|---------------------------------------------------------------------------------|-----------------------------|-----------------|------------------------------------------------------------------------------------------------------------|-----------------------------|-----------------|
|                                                                                                                                 | Negative attitude<br>N=1597                                            | Positive attitude<br>N=3690 | <i>p</i> -Value | Negative attitude<br>N=2398                                                     | Positive attitude<br>N=2889 | <i>p</i> -Value | Negative attitude<br>N=2206                                                                                | Positive attitude<br>N=3081 | <i>p</i> -Value |
| Vaccination status, N (%)                                                                                                       |                                                                        |                             | <0.001          |                                                                                 |                             | <0.001          |                                                                                                            |                             | <0.001          |
| Unvaccinated                                                                                                                    | 84 (5.3)                                                               | 19 (0.5)                    |                 | 85 (3.5)                                                                        | 18 (0.6)                    |                 | 88 (4.0)                                                                                                   | 15 (0.5)                    |                 |
| Vaccinated                                                                                                                      | 1513 (94.7)                                                            | 3671 (99.5)                 |                 | 2313 (96.5)                                                                     | 2871 (99.4)                 |                 | 2118 (96.0)                                                                                                | 3066 (99.5)                 |                 |
| Reasons for not getting vaccinated (N = 103), N (%)                                                                             |                                                                        |                             | 0.004           |                                                                                 |                             | 0.011           |                                                                                                            |                             | <0.001          |
| I am suffering from a clinical condition with contraindications to COVID-19 vaccination/ waiting for further medical assessment | 14 (16.7)                                                              | 3 (15.8)                    |                 | 14 (16.5)                                                                       | 3 (16.7)                    |                 | 14 (15.9)                                                                                                  | 3 (20.0)                    |                 |
| I've already had COVID-19                                                                                                       | 16 (19.0)                                                              | 5 (26.3)                    |                 | 17 (20.0)                                                                       | 4 (22.2)                    |                 | 17 (19.3)                                                                                                  | 4 (26.7)                    |                 |
| I've booked the vaccination/I am waiting to get vaccinated                                                                      | 6 (7.1)                                                                | 6 (31.6)                    |                 | 6 (7.1)                                                                         | 6 (33.3)                    |                 | 6 (6.8)                                                                                                    | 6 (40.0)                    |                 |
| I don't consider myself at risk/prefer to obtain natural immunity to COVID-19                                                   | 13 (15.5)                                                              | 2 (10.5)                    |                 | 14 (16.5)                                                                       | 1 (5.6)                     |                 | 15 (17.0)                                                                                                  | 0 (0.0)                     |                 |
| I don't believe in the safety/effectiveness of vaccines against COVID-19                                                        | 32 (38.1)                                                              | 1 (5.3)                     |                 | 31 (36.5)                                                                       | 2 (11.1)                    |                 | 33 (37.5)                                                                                                  | 0 (0.0)                     |                 |
| No reason given                                                                                                                 | 3 (3.6)                                                                | 2 (10.5)                    |                 | 3 (3.5)                                                                         | 2 (11.1)                    |                 | 3 (3.4)                                                                                                    | 2 (13.3)                    |                 |
| Vaccine-adverse events (N= 5184), N (%)                                                                                         |                                                                        |                             | 0.090           |                                                                                 |                             | 0.330           |                                                                                                            |                             | 0.250           |
| No adverse events                                                                                                               | 550 (36.4)                                                             | 1242 (33.8)                 |                 | 819 (35.4)                                                                      | 973 (33.9)                  |                 | 758 (35.8)                                                                                                 | 1034 (33.7)                 |                 |
| Mild adverse events                                                                                                             | 820 (54.2)                                                             | 2022 (55.1)                 |                 | 1262 (54.6)                                                                     | 1580 (55.0)                 |                 | 1146 (54.1)                                                                                                | 1696 (55.3)                 |                 |

|                                                                        |           |            |        |            |            |        |            |            |        |
|------------------------------------------------------------------------|-----------|------------|--------|------------|------------|--------|------------|------------|--------|
| Moderate or severe adverse events                                      | 143 (9.5) | 407 (11.1) |        | 232 (10.0) | 318 (11.1) |        | 214 (10.1) | 336 (11.0) |        |
| Perceived COVID-19 severity, mean (SD)                                 | 6.9 (2.2) | 7.9 (1.7)  | <0.001 | 7.1 (2.0)  | 8.0 (1.7)  | <0.001 | 7.0 (2.0)  | 8.0 (1.7)  | <0.001 |
| Concern about the COVID-19 emergency, mean (SD)                        | 6.7 (2.3) | 7.8 (1.8)  | <0.001 | 6.9 (2.1)  | 7.9 (1.8)  | <0.001 | 6.8 (2.1)  | 7.9 (1.8)  | <0.001 |
| Being afraid of infecting people in the community, mean (SD)           | 6.8 (2.6) | 8.5 (2.0)  | <0.001 | 7.2 (2.5)  | 8.7 (1.9)  | <0.001 | 7.2 (2.5)  | 8.6 (2.0)  | <0.001 |
| Being afraid of becoming infected, mean (SD)                           | 6.4 (2.7) | 7.9 (2.3)  | <0.001 | 6.7 (2.6)  | 8.1 (2.3)  | <0.001 | 6.5 (2.6)  | 8.1 (2.3)  | <0.001 |
| Viewing the vaccine as an effective way to end the pandemic, mean (SD) | 7.5 (2.5) | 9.4 (1.3)  | <0.001 | 8.0 (2.4)  | 9.5 (1.1)  | <0.001 | 7.9 (2.4)  | 9.5 (1.2)  | <0.001 |

COVID-19: coronavirus disease 2019.

Pearson's chi-squared test or Fisher's exact test for categorical variables and Mann-Whitney U test for continuous variables.
